# Supplementary material for: MoS2 2D materials induce spinal cord neuroinflammation and neurotoxicity affecting locomotor performance in zebrafish
Source: Royal Society of Chemistry journal article supplement (doi:10.1039/d4nh00041b), 2024-01-01
Supplement: d4nh00041b11.pdf [file d4nh00041b11.pdf]

|                             |              |
|-----------------------------|--------------|
| <b>Intercept</b>            | 0.00758      |
| <b>Slope</b>                | 0.00283      |
| <b>R<sup>2</sup></b>        | 0.99815      |
| <b>Linear range (µg/mL)</b> | <b>5-100</b> |
