# Supplementary figures and images for: MoS2 2D materials induce spinal cord neuroinflammation and neurotoxicity affecting locomotor performance in zebrafish
Source: Royal Society of Chemistry journal article supplement (doi:10.1039/d4nh00041b), 2024-01-01

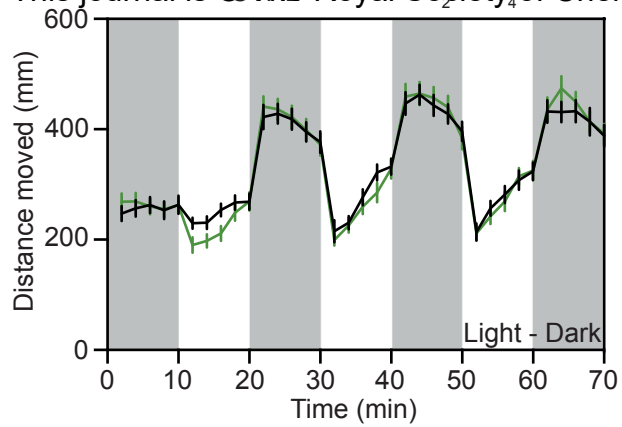

Supplement: d4nh00041b4.pdf [file d4nh00041b4.pdf]

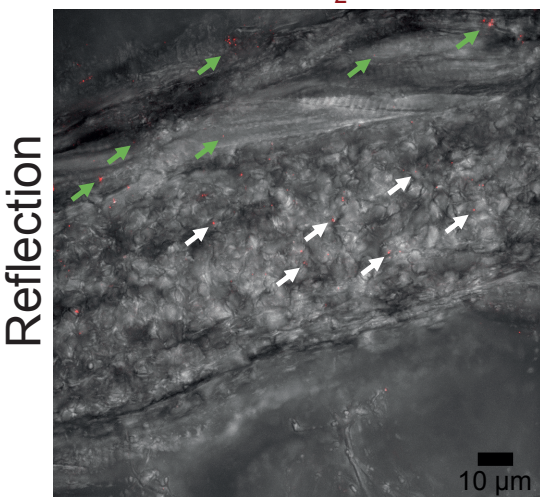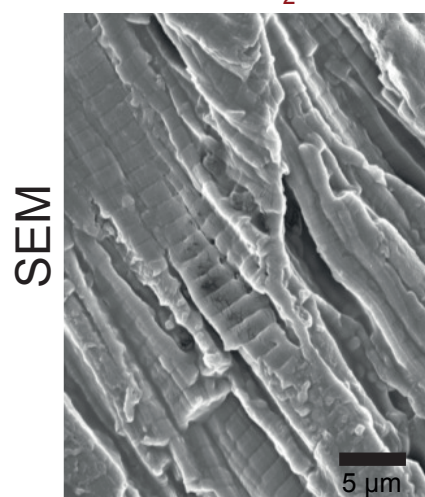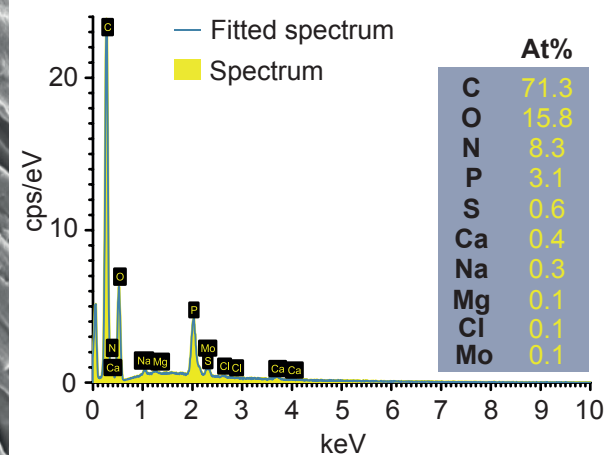

Supplement: d4nh00041b6.pdf [file d4nh00041b6.pdf]

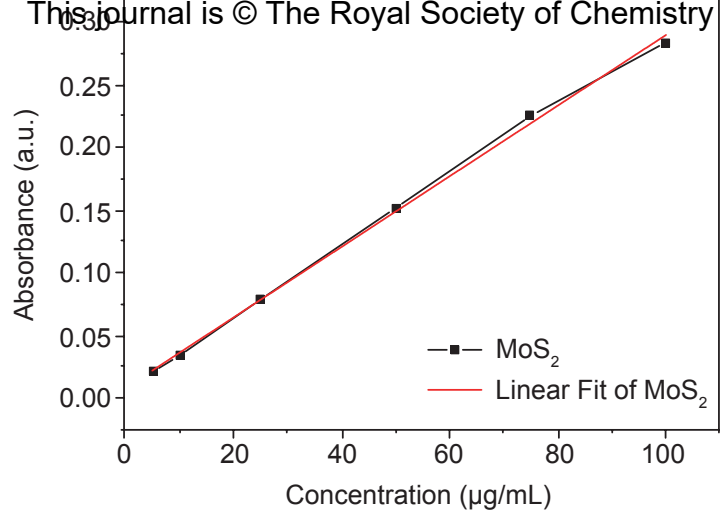

Supplement: d4nh00041b7.pdf [file d4nh00041b7.pdf]

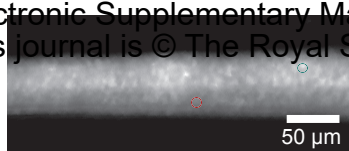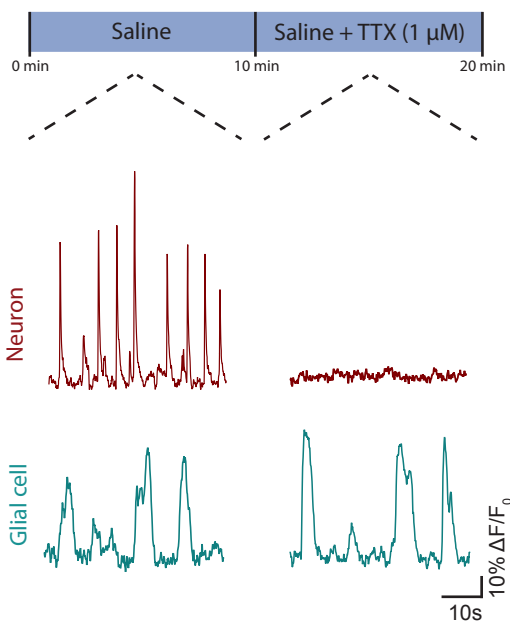

Supplement: d4nh00041b8.pdf [file d4nh00041b8.pdf]
